# Supplementary material
Source: PubMed Central journal article supplement (PMC11462524)
Supplement: JTCM-44-5-954-s10.pdf [file JTCM-44-5-954-s10.pdf]

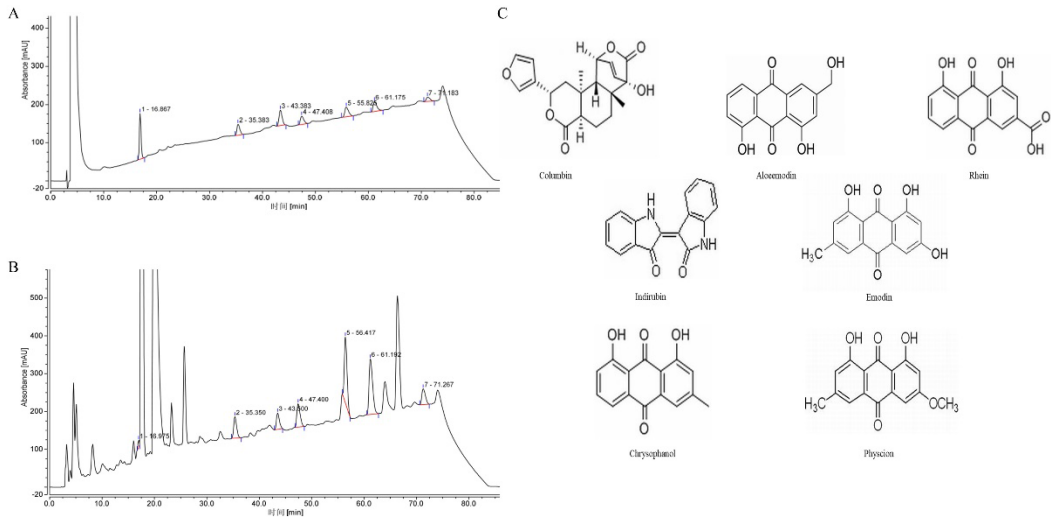

**Supplementary Figure 1** High-performance liquid chromatography high-resolution mass spectrometry of standard substances and Qingfei Zhisou oral liquid

A: represent standard substances, B: represent Qingfei Zhisou oral liquid respectively. Seven identified compounds, including columbin (peak 1), aloeemodin (peak 2), rhein (peak 3), indirubin (peak 4), emodin (peak 5), chrysophanol (peak 6) and physcion (peak 7). C: Structures of these components.

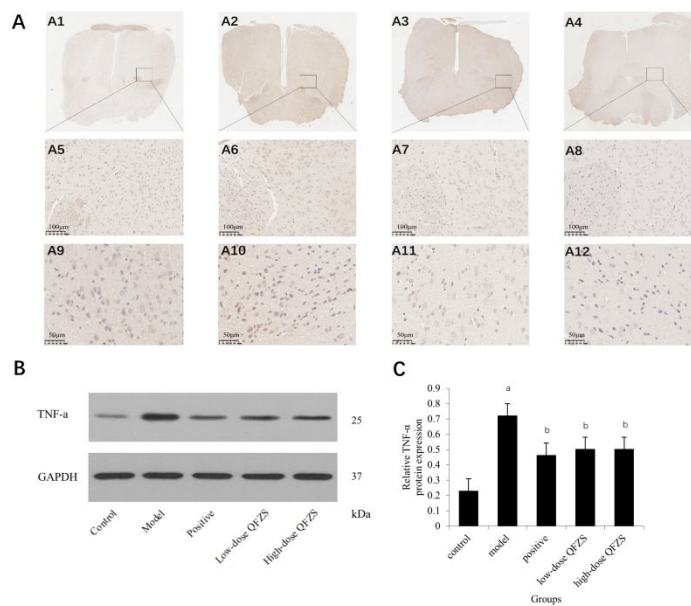

## Supplementary Figure 2 Effect of QFZS on TNF- $\alpha$ expression

A: the immunohistochemistry staining of TNF- $\alpha$ . A1-A4: images of control (A1), model (A2), Lose-dose QFZS (A3), High-dose QFZS (A4) ( $\times 1$ ); A5-A8: images of control (A5), model (A6), Lose-dose QFZS (A7), High-dose QFZS (A8) ( $\times 200$ , bar = 100  $\mu\text{m}$ ); A9-A12: images of control (A9), model (A10), Lose-dose QFZS (A11), High-dose QFZS (A12) ( $\times 400$ , bar = 50  $\mu\text{m}$ ). B: Western blotting representative images of TNF- $\alpha$  respective quantification in the hypothalamus. C: protein expression levels of TNF- $\alpha$ . Control group: sham operated; Model group: Yeast-induced fever model without treatment; Positive group: Yeast-induced fever model with Aspirin (100 mg/kg); Lose-dose QFZS group: Yeast-induced fever model with low-dose QFZS (2.82 g/kg); High-dose QFZS group: Yeast-induced fever model with high-dose QFZS (5.64 g/kg). TNF- $\alpha$ : tumor necrosis factor- $\alpha$ ; GAPDH: glyceraldehyde-3-phosphate dehydrogenase; QFZS: Qingfei Zhisou oral liquid. Data represent the mean  $\pm$  standard deviation using one-way analysis of variance ( $n = 5$ ). Compared with the sham group, <sup>a</sup> $P < 0.05$ ; compared with the model group, <sup>b</sup> $P < 0.05$ .

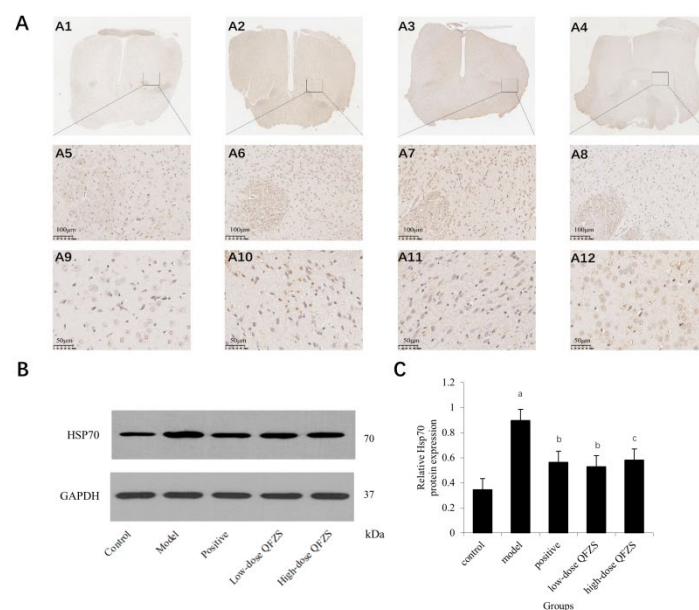

### Supplementary Figure 3 Effects of QFZS on HSP70 expression

A: the immunohistochemistry staining of HSP70, A1-A4: images of control (A1), model (A2), Lose-dose QFZS (A3), High-dose QFZS(A4) ( $\times 1$ ); A5-A8: images of control (A5), model (A6), Lose-dose QFZS (A7), High-dose QFZS(A8) ( $\times 200$ , bar = 100  $\mu\text{m}$ ); A9-A12: images of control (A9), model (A10), Lose-dose QFZS (A11), High-dose QFZS (A12) ( $\times 400$ , bar = 50  $\mu\text{m}$ ). B: Western blotting representative images of HSP70 respective quantification in the hypothalamus. C: protein expression levels of HSP70. Control group: sham operated; Model group: Yeast-induced fever model without treatment; Positive group: Yeast-induced fever model with Aspirin (100 mg/kg); Lose-dose QFZS group: Yeast-induced fever model with low-dose QFZS (2.82 g/kg); High-dose QFZS group: Yeast-induced fever model with high-dose QFZS (5.64 g/kg). HSP70: heat shock protein 70; GAPDH: glyceraldehyde-3-phosphate dehydrogenase; QFZS: Qingfei Zhisou oral liquid. Data represent the mean  $\pm$  standard deviation using one-way analysis of variance ( $n = 5$ ). Compared with the sham group,  $^aP < 0.05$ ; compared with the model group,  $^bP < 0.01$ ,  $^cP < 0.05$ .

### Supplementary Table 1 Differentially produced metabolites between model and low-dose QFZS groups

| No. | m/z      | VIP     | Adducts      | Formula    | Metabolites                          |
|-----|----------|---------|--------------|------------|--------------------------------------|
| 1   | 758.5691 | 34.8501 | M+H          | C42H80NO8P | PC (16:1(9Z)/18:1(11Z))              |
| 2   | 502.2928 | 3.0538  | M+H, M+Na    | C32H39NO4  | Fexofenadine                         |
| 3   | 204.1230 | 2.6858  | M+H          | C9H17NO4   | L-Acetylcarnitine                    |
| 4   | 590.3215 | 1.9528  | M+Na, M+K    | C30H50NO7P | LysoPC (22:6(4Z,7Z,10Z,13Z,16Z,19Z)) |
| 5   | 303.2317 | 1.9487  | M+H-H2O, M+H | C20H30O2   | Eicosapentaenoic acid                |

|    |          |         |                    |            |                                  |
|----|----------|---------|--------------------|------------|----------------------------------|
| 6  | 319.2276 | 2.0959  | M-H, 2M-H, M-H2O-H | C20H32O3   | 20-Hydroxyeicosatetraenoic acid  |
| 7  | 494.3242 | 8.1627  | M+H, M+Na, M+K     | C24H48NO7P | LysoPC (16:1(9Z)/0:0)            |
| 8  | 796.5848 | 14.9298 | M+Na               | C43H84NO8P | PE (14:0/24:1(15Z))              |
| 9  | 510.3920 | 2.1719  | M+H                | C26H56NO6P | LysoPC (O-18:0)                  |
| 10 | 578.4182 | 2.4225  | M+H                | C30H60NO7P | LysoPC (22:1(13Z))               |
| 11 | 552.4024 | 4.2425  | M+H                | C28H58NO7P | LysoPC (20:0/0:0)                |
| 12 | 482.3242 | 6.4707  | M+H, M+Na          | C23H48NO7P | LysoPC (15:0)                    |
| 13 | 570.3554 | 6.8526  | M+H, M+K, M+Na     | C30H52NO7P | LysoPC (22:5(4Z,7Z,10Z,13Z,16Z)) |
| 14 | 249.1556 | 2.5709  | M+NH4              | C9H17N3O4  | AsparaginyI-Valine               |
| 15 | 554.3462 | 4.2484  | M+FA-H             | C25H52NO7P | LysoPC (17:0)                    |
| 16 | 274.2740 | 9.4643  | M+NH4              | C16H32O2   | Palmitic acid                    |
| 17 | 550.3866 | 6.6137  | M+H, M+Na          | C28H56NO7P | LysoPC (20:1(11Z))               |
| 18 | 562.3150 | 2.2039  | M+FA-H             | C26H48NO7P | LysoPC (18:3(6Z,9Z,12Z))         |
| 19 | 318.3001 | 2.8399  | M+NH4              | C18H36O3   | 2-Hydroxystearic acid            |
| 20 | 542.3244 | 3.0525  | M+H, M+K, M+Na     | C28H48NO7P | LysoPC (20:5(5Z,8Z,11Z,14Z,17Z)) |
| 21 | 496.3398 | 31.2168 | M+H, M+Na, M+H-H2O | C24H50NO7P | LysoPC (16:0)                    |
| 22 | 566.3216 | 2.6563  | M+Na, M+K, M+H-H2O | C28H50NO7P | LysoPC (20:4(8Z,11Z,14Z,17Z))    |
| 23 | 508.3764 | 6.2428  | M+H, M+Na          | C26H54NO6P | LysoPC (P-18:0)                  |
| 24 | 548.3710 | 9.0515  | M+H, M+K           | C28H54NO7P | LysoPC (20:2(11Z,14Z))           |
| 25 | 594.3778 | 2.2844  | M+FA-H             | C28H56NO7P | PC (18:1(9Z)e/2:0)               |
| 26 | 619.2888 | 3.4525  | 2M-H               | C19H19FN2O | N-Desmethylcitalopram            |
| 27 | 471.3470 | 4.1121  | M+H                | C30H46O4   | Glycyrrhetic acid                |

|    |          |         |                |            |                                   |
|----|----------|---------|----------------|------------|-----------------------------------|
| 28 | 570.3555 | 8.7700  | M+Na, M+K, M+H | C30H52NO7P | LysoPC (22:5(7Z,10Z,13Z,16Z,19Z)) |
| 29 | 572.3710 | 6.6701  | M+H, M+K, M+Na | C30H54NO7P | LysoPC (22:4(7Z,10Z,13Z,16Z))     |
| 30 | 522.3555 | 27.5272 | M+H, M+K       | C26H52NO7P | LysoPC (18:1(11Z))                |
| 31 | 431.0981 | 2.1655  | M-H2O-H        | C21H22O11  | Phloretin 2'-O-glucuronide        |

---

Notes: QFZS: Qingfei Zhisou oral liquid; VIP: variable importance in the projection.

**Supplementary Table 2** Differentially produced metabolites between model and high-dose QFZS

groups

| No. | m/z      | VIP     | Adducts                         | Formula                                           | Metabolites                       |
|-----|----------|---------|---------------------------------|---------------------------------------------------|-----------------------------------|
| 1   | 496.3398 | 35.9193 | M+H, M+Na, M+H-H <sub>2</sub> O | C <sub>24</sub> H <sub>50</sub> NO <sub>7</sub> P | LysoPC (16:0)                     |
| 2   | 522.3555 | 25.0782 | M+H, M+K                        | C <sub>26</sub> H <sub>52</sub> NO <sub>7</sub> P | LysoPC (18:1(11Z))                |
| 3   | 274.2740 | 10.6796 | M+NH <sub>4</sub>               | C <sub>16</sub> H <sub>32</sub> O <sub>2</sub>    | Palmitic acid                     |
| 4   | 548.3710 | 9.5197  | M+H, M+K                        | C <sub>28</sub> H <sub>54</sub> NO <sub>7</sub> P | LysoPC (20:2(11Z,14Z))            |
| 5   | 570.3555 | 9.2218  | M+Na, M+K, M+H                  | C <sub>30</sub> H <sub>52</sub> NO <sub>7</sub> P | LysoPC (22:5(7Z,10Z,13Z,16Z,19Z)) |
| 6   | 550.3866 | 7.9413  | M+H, M+Na                       | C <sub>28</sub> H <sub>56</sub> NO <sub>7</sub> P | LysoPC (20:1(11Z))                |
| 7   | 572.3710 | 6.8614  | M+H, M+K, M+Na                  | C <sub>30</sub> H <sub>54</sub> NO <sub>7</sub> P | LysoPC (22:4(7Z,10Z,13Z,16Z))     |
| 8   | 482.3242 | 6.7538  | M+H, M+Na                       | C <sub>23</sub> H <sub>48</sub> NO <sub>7</sub> P | LysoPC (15:0)                     |
| 9   | 508.3764 | 6.5666  | M+H, M+Na                       | C <sub>26</sub> H <sub>54</sub> NO <sub>6</sub> P | LysoPC (P-18:0)                   |
| 10  | 570.3554 | 6.1066  | M+H, M+K, M+Na                  | C <sub>30</sub> H <sub>52</sub> NO <sub>7</sub> P | LysoPC (22:5(4Z,7Z,10Z,13Z,16Z))  |
| 11  | 552.4024 | 4.8576  | M+H                             | C <sub>28</sub> H <sub>58</sub> NO <sub>7</sub> P | LysoPC (20:0/0:0)                 |
| 12  | 471.3470 | 4.4941  | M+H                             | C <sub>30</sub> H <sub>46</sub> O <sub>4</sub>    | Glycyrrhetic acid                 |
| 13  | 554.3462 | 4.4401  | M+FA-H                          | C <sub>25</sub> H <sub>52</sub> NO <sub>7</sub> P | LysoPC (17:0)                     |
| 14  | 619.2888 | 3.3593  | 2M-H                            | C <sub>19</sub> H <sub>19</sub> FN <sub>2</sub> O | N-Desmethylcitalopram             |
| 15  | 318.3001 | 3.3362  | M+NH <sub>4</sub>               | C <sub>18</sub> H <sub>36</sub> O <sub>3</sub>    | 2-Hydroxystearic acid             |
| 16  | 431.0981 | 3.2746  | M-H <sub>2</sub> O-H            | C <sub>21</sub> H <sub>22</sub> O <sub>11</sub>   | Pjlorelin 2'-O-glucuronide        |
| 17  | 267.0719 | 2.9820  | M+FA-H                          | C <sub>8</sub> H <sub>14</sub> O <sub>7</sub>     | Ethyl glucuronide                 |
| 18  | 380.2559 | 2.9799  | M+H, M+Na, M+H-H <sub>2</sub> O | C <sub>18</sub> H <sub>38</sub> NO <sub>5</sub> P | Sphingosine 1-phosphate           |

|    |          |        |                                   |            |                               |
|----|----------|--------|-----------------------------------|------------|-------------------------------|
| 19 | 533.3258 | 2.9616 | M+H, M+K, M+NH4,<br>M+Na, M+H-H2O | C26H45NO7S | Tauro-b-muricholic acid       |
| 20 | 204.1230 | 2.7523 | M+H                               | C9H17NO4   | L-Acetylcarnitine             |
| 21 | 594.3778 | 2.6987 | M+FA-H                            | C28H56NO7P | PC (18:1(9Z)e/2:0)            |
| 22 | 578.4182 | 2.5765 | M+H                               | C30H60NO7P | LysoPC (22:1(13Z))            |
| 23 | 510.3920 | 2.4826 | M+H                               | C26H56NO6P | LysoPC (O-18:0)               |
| 24 | 162.1124 | 2.3336 | M+H                               | C7H15NO3   | L-Carnitine                   |
| 25 | 350.1486 | 2.3064 | M+H-H2O                           | C20H21N3O4 | Tryptophyl-Tyrosine           |
| 26 | 566.3216 | 2.2909 | M+Na, M+K, M+H-H2O                | C28H50NO7P | LysoPC (20:4(8Z,11Z,14Z,17Z)) |
| 27 | 316.3209 | 2.1261 | M+NH4                             | C19H38O2   | Nonadecanoic acid             |
| 28 | 195.0500 | 1.8008 | M-H                               | C6H12O7    | Galactonic acid               |
| 29 | 212.0014 | 1.7431 | M-H                               | C8H7NO4S   | Indoxyl sulfate               |
| 30 | 206.1387 | 1.7092 | M+H, M+Na                         | C9H19NO4   | Pantothenol                   |

---

Notes: QFZS: Qingfei Zhisou oral liquid; VIP: variable importance in the projection.
